# Supplementary material for: Lateral neck dissection surgeon volume and complications in head and neck endocrine malignancy
Source: PubMed Central journal article supplement — Gland Surg. 2023 Jul 10;12(7):917–27. doi: 10.21037/gs-22-385 (PMC10506124; doi:10.21037/gs-22-385), 2023-07-10
Supplement: gs-12-07-917-supplementary.pdf [file gs-12-07-917-supplementary.pdf]

**Table S1** States included in the Nationwide Inpatient Sample analysis

| State          | Year |           |      |      |      |      |      |      |      |
|----------------|------|-----------|------|------|------|------|------|------|------|
|                | 2000 | 2001–2002 | 2003 | 2004 | 2005 | 2006 | 2007 | 2008 | 2009 |
| Arizona        | x    | x         | x    | x    | x    | x    | x    | o    | o    |
| Florida        | o    | o         | o    | o    | o    | o    | o    | o    | o    |
| Georgia        | x    | x         | x    | x    | x    | x    | x    | o    | o    |
| Iowa           | o    | o         | o    | o    | o    | o    | o    | o    | o    |
| Kansas         | x    | o         | o    | o    | o    | o    | o    | o    | o    |
| Maine          | o    | o         | o    | o    | o    | o    | o    | o    | o    |
| Maryland       | o    | o         | o    | o    | o    | o    | o    | o    | o    |
| Nevada         | x    | o         | o    | o    | o    | o    | o    | o    | o    |
| New Hampshire  | x    | x         | o    | o    | o    | o    | o    | o    | o    |
| New Jersey     | x    | x         | x    | x    | x    | x    | x    | o    | o    |
| New Mexico     | x    | x         | o    | o    | o    | o    | o    | o    | o    |
| New York       | o    | o         | o    | o    | o    | o    | o    | o    | o    |
| North Carolina | o    | x         | x    | x    | x    | x    | x    | x    | x    |
| Oregon         | x    | x         | x    | x    | x    | x    | x    | o    | o    |
| Pennsylvania   | o    | o         | o    | o    | o    | o    | o    | o    | o    |
| South Carolina | o    | o         | o    | o    | o    | o    | o    | o    | o    |
| South Dakota   | x    | o         | o    | o    | o    | o    | o    | o    | o    |
| Texas          | o    | o         | o    | o    | o    | o    | o    | o    | o    |
| Virginia       | o    | o         | o    | o    | o    | o    | o    | o    | o    |

Years demarcated with “o” had surgeon tracking data reliable for use, while “x” demarcates years with unreliable surgeon tracking data. States without any years with reliable data are omitted from the table. States were considered as reliable if tracking the National Provider Identifier (NPI), Unique Physician Identification Number (UPIN), or state-specific license number for all observations from that state.

**Table S2** Codes used to define the cohort, complications, and covariates

| Description                                                                                  | Code source                              | Codes                                                                                                                                                                                                                                                                                                                                                                                                                                                                                                                                                                                                                                                                                                                                                                  |
|----------------------------------------------------------------------------------------------|------------------------------------------|------------------------------------------------------------------------------------------------------------------------------------------------------------------------------------------------------------------------------------------------------------------------------------------------------------------------------------------------------------------------------------------------------------------------------------------------------------------------------------------------------------------------------------------------------------------------------------------------------------------------------------------------------------------------------------------------------------------------------------------------------------------------|
| <b>Cohort</b>                                                                                |                                          |                                                                                                                                                                                                                                                                                                                                                                                                                                                                                                                                                                                                                                                                                                                                                                        |
| Neck dissection                                                                              | ICD-9-CM procedure codes                 | 40.40, 40.41, 40.42, and 40.3 if accompanying the diagnosis codes in <i>Table S3</i>                                                                                                                                                                                                                                                                                                                                                                                                                                                                                                                                                                                                                                                                                   |
| Squamous cell carcinoma                                                                      | ICD-9-CM diagnosis codes                 | 140, 140.0, 140.1, 140.2, 140.3, 140.4, 140.5, 140.6, 140.8, 140.9, 141, 141.0, 141.1, 141.2, 141.3, 141.4, 141.5, 141.6, 141.8, 141.9, 143, 143.0, 143.1, 143.8, 143.9, 144, 144.0, 144.1, 144.8, 144.9, 145, 145.0, 145.1, 145.2, 145.3, 145.4, 145.5, 145.6, 145.8, 145.9, 146, 146.0, 146.1, 146.2, 146.3, 146.4, 146.5, 146.6, 146.7, 146.8, 146.9, 147, 147.0, 147.1, 147.2, 147.3, 147.8, 147.9, 148, 148.0, 148.1, 148.2, 148.3, 148.8, 148.9, 149, 149.0, 149.1, 149.8, 149.9, 150, 150.0, 160, 160.0, 160.1, 160.2, 160.3, 160.4, 160.5, 160.8, 160.9, 161, 161.0, 161.1, 161.2, 161.3, 161.8, 161.9, 170.0, 170.1, 230.0, 231.0, 232.0, 232.1, 232.2, 232.3, 232.4, V10.01, V10.02, V10.22, V10.21, 162.0, V10.12, 165.0, 230.9, 231.1, 231.8, 231.9, 232.9 |
| <b>Primary exposure</b>                                                                      |                                          |                                                                                                                                                                                                                                                                                                                                                                                                                                                                                                                                                                                                                                                                                                                                                                        |
| Surgeon                                                                                      | HCUP-NIS Inpatient Core files            | For NIS: SURGID_S for year 2000, MDNUM2_S for years 2001–2002, and MDNUM2_R for years 2003–2009<br><br>For SID: MDNUM2_R (operating physician)                                                                                                                                                                                                                                                                                                                                                                                                                                                                                                                                                                                                                         |
| <b>Primary outcome</b>                                                                       |                                          |                                                                                                                                                                                                                                                                                                                                                                                                                                                                                                                                                                                                                                                                                                                                                                        |
| Nerve injury (cranial nerves, phrenic nerve, brachial plexus and cervical sympathetic trunk) | ICD-9-CM diagnosis codes                 | 350.8, 351.8, 352.2, 352.3, 352.4, 352.5, 352.9, 354.8, 337.9                                                                                                                                                                                                                                                                                                                                                                                                                                                                                                                                                                                                                                                                                                          |
| Chyle leak                                                                                   | ICD-9-CM diagnosis codes                 | 457.8                                                                                                                                                                                                                                                                                                                                                                                                                                                                                                                                                                                                                                                                                                                                                                  |
| Hematoma                                                                                     | ICD-9-CM diagnosis codes                 | 998.12, 998.11, 998.13                                                                                                                                                                                                                                                                                                                                                                                                                                                                                                                                                                                                                                                                                                                                                 |
| Wound complication (seroma, respiratory, cardiac, urology)                                   | ICD-9-CM diagnosis codes                 | 998.3, 998.30, 998.31, 998.32, 998.5, 998.51, 998.59, 998.6, 998.4, 998.2, 998.81, 998.83, 998.87                                                                                                                                                                                                                                                                                                                                                                                                                                                                                                                                                                                                                                                                      |
| <b>Comorbidities</b>                                                                         |                                          |                                                                                                                                                                                                                                                                                                                                                                                                                                                                                                                                                                                                                                                                                                                                                                        |
| Elixhauser comorbidities                                                                     | HCUP-NIS Disease Severity Measures files | CM_AIDS, CM_ALCOHOL, CM_ANEMDEF, CM_ARTH, CM_BLDLOSS, CM_CHF, CM_CHRNLUNG, CM_COAG, CM_DEPRESS, CM_DM, CM_DMCX, CM_DRUG, CM_HTN_C, CM_HYPOTHY, CM_LIVER, CM_LYMPH, CM_LYTES, CM_METS, CM_NEURO, CM_OBESE, CM_PARA, CM_PERIVASC, CM_PSYCH, CM_PULMCIRC, CM_RENLFAIL, CM_TUMOR, CM_ULCER, CM_VALVE, CM_WGHTLOSS                                                                                                                                                                                                                                                                                                                                                                                                                                                          |
| Pedicled or free flap reconstruction                                                         | ICD-9-CM procedure codes                 | 86.7, 86.70, 86.71, 86.72, 86.73, 86.74, 86.75, 86.6, 86.89                                                                                                                                                                                                                                                                                                                                                                                                                                                                                                                                                                                                                                                                                                            |
| Total laryngectomy                                                                           | ICD-9-CM procedure codes                 | 30.3, 30.4                                                                                                                                                                                                                                                                                                                                                                                                                                                                                                                                                                                                                                                                                                                                                             |
| Prior radiation                                                                              | ICD-9-CM diagnosis codes                 | V15.3                                                                                                                                                                                                                                                                                                                                                                                                                                                                                                                                                                                                                                                                                                                                                                  |

ICD-9-CM, The International Classification of Diseases, Ninth Revision, Clinical Modification; HCUP, the Health Care Utilization Project; NIS, Nationwide Inpatient Sample; SID, State Inpatient Database.

**Table S3** Patients with ICD-9 procedure codes 40.40, 40.41, 40.42 were included in the study regardless of the diagnosis codes. Patients with ICD-9 procedure code 40.3 (general lymph node excision) in conjunction with the following ICD-9 diagnosis codes were included

| Description                                                                    | ICD-9-CM diagnosis codes                                                                                                                                                                                                                                                                                                                                                                                                                                                                                                                                                                                                                                                      |
|--------------------------------------------------------------------------------|-------------------------------------------------------------------------------------------------------------------------------------------------------------------------------------------------------------------------------------------------------------------------------------------------------------------------------------------------------------------------------------------------------------------------------------------------------------------------------------------------------------------------------------------------------------------------------------------------------------------------------------------------------------------------------|
| Squamous cell carcinoma                                                        | 140, 140.0, 140.1, 140.2, 140.3, 140.4, 140.5, 140.6, 140.8, 140.9, 141, 141.0, 141.1, 141.2, 141.3, 141.4, 141.5, 141.6, 141.8, 141.9, 143, 143.0, 143.1, 143.8, 143.9, 144, 144.0, 144.1, 144.8, 144.9, 145, 145.0, 145.1, 145.2, 145.3, 145.4, 145.5, 145.6, 145.8, 145.9, 146, 146.0, 146.1, 146.2, 146.3, 146.4, 146.5, 146.6, 146.7, 146.8, 146.9, 147, 147.0, 147.1, 147.2, 147.3, 147.8, 147.9, 148, 148.0, 148.1, 148.2, 148.3, 148.8, 148.9, 149, 149.0, 149.1, 149.8, 149.9, 150, 150.0, 160, 160.0, 160.1, 160.2, 160.3, 160.4, 160.5, 160.8, 160.9, 161, 161.0, 161.1, 161.2, 161.3, 161.8, 161.9, 170.0, 170.1, 230.0, 231.0, 232.0, 232.1, 232.2, 232.3, 232.4 |
| Cutaneous malignancy                                                           | 172, 172.0, 172.1, 172.2, 172.3, 172.4, 171.0, 173, 173.0, 173.00, 173.01, 173.02, 173.09, 173.1, 173.10, 173.11, 173.12, 173.19, 173.2, 173.20, 173.21, 173.22, 173.29, 173.3, 173.30, 173.31, 173.32, 173.39, 173.4, 173.40, 173.41, 173.42, 173.49                                                                                                                                                                                                                                                                                                                                                                                                                         |
| Other head and neck malignancy (neural tumors, other head and neck malignancy) | 190, 190.1, 190.2, 190.3, 190.4, 190.5, 190.6, 190.7, 190.8, 190.9, 192.0, 195.0, 234.0, 234.8, 234.9, 235.1, 235.6, 238.1, 238.2                                                                                                                                                                                                                                                                                                                                                                                                                                                                                                                                             |
| Salivary gland malignancy                                                      | 142, 142.0, 142.1, 142.2, 142.8, 142.9, 235.0                                                                                                                                                                                                                                                                                                                                                                                                                                                                                                                                                                                                                                 |
| Thyroid/parathyroid malignancy                                                 | We did not include the procedure code 40.3 for thyroid/parathyroid malignancy                                                                                                                                                                                                                                                                                                                                                                                                                                                                                                                                                                                                 |

ICD-9-CM, The International Classification of Diseases, Ninth Revision, Clinical Modification.
